# Supplementary material for: Impact of the terrestrial-aquatic transition on disparity and rates of evolution in the carnivoran skull
Source: PubMed Central journal article supplement (PMC4328284; doi:10.1186/s12862-015-0285-5), 2015-02-04

PC1

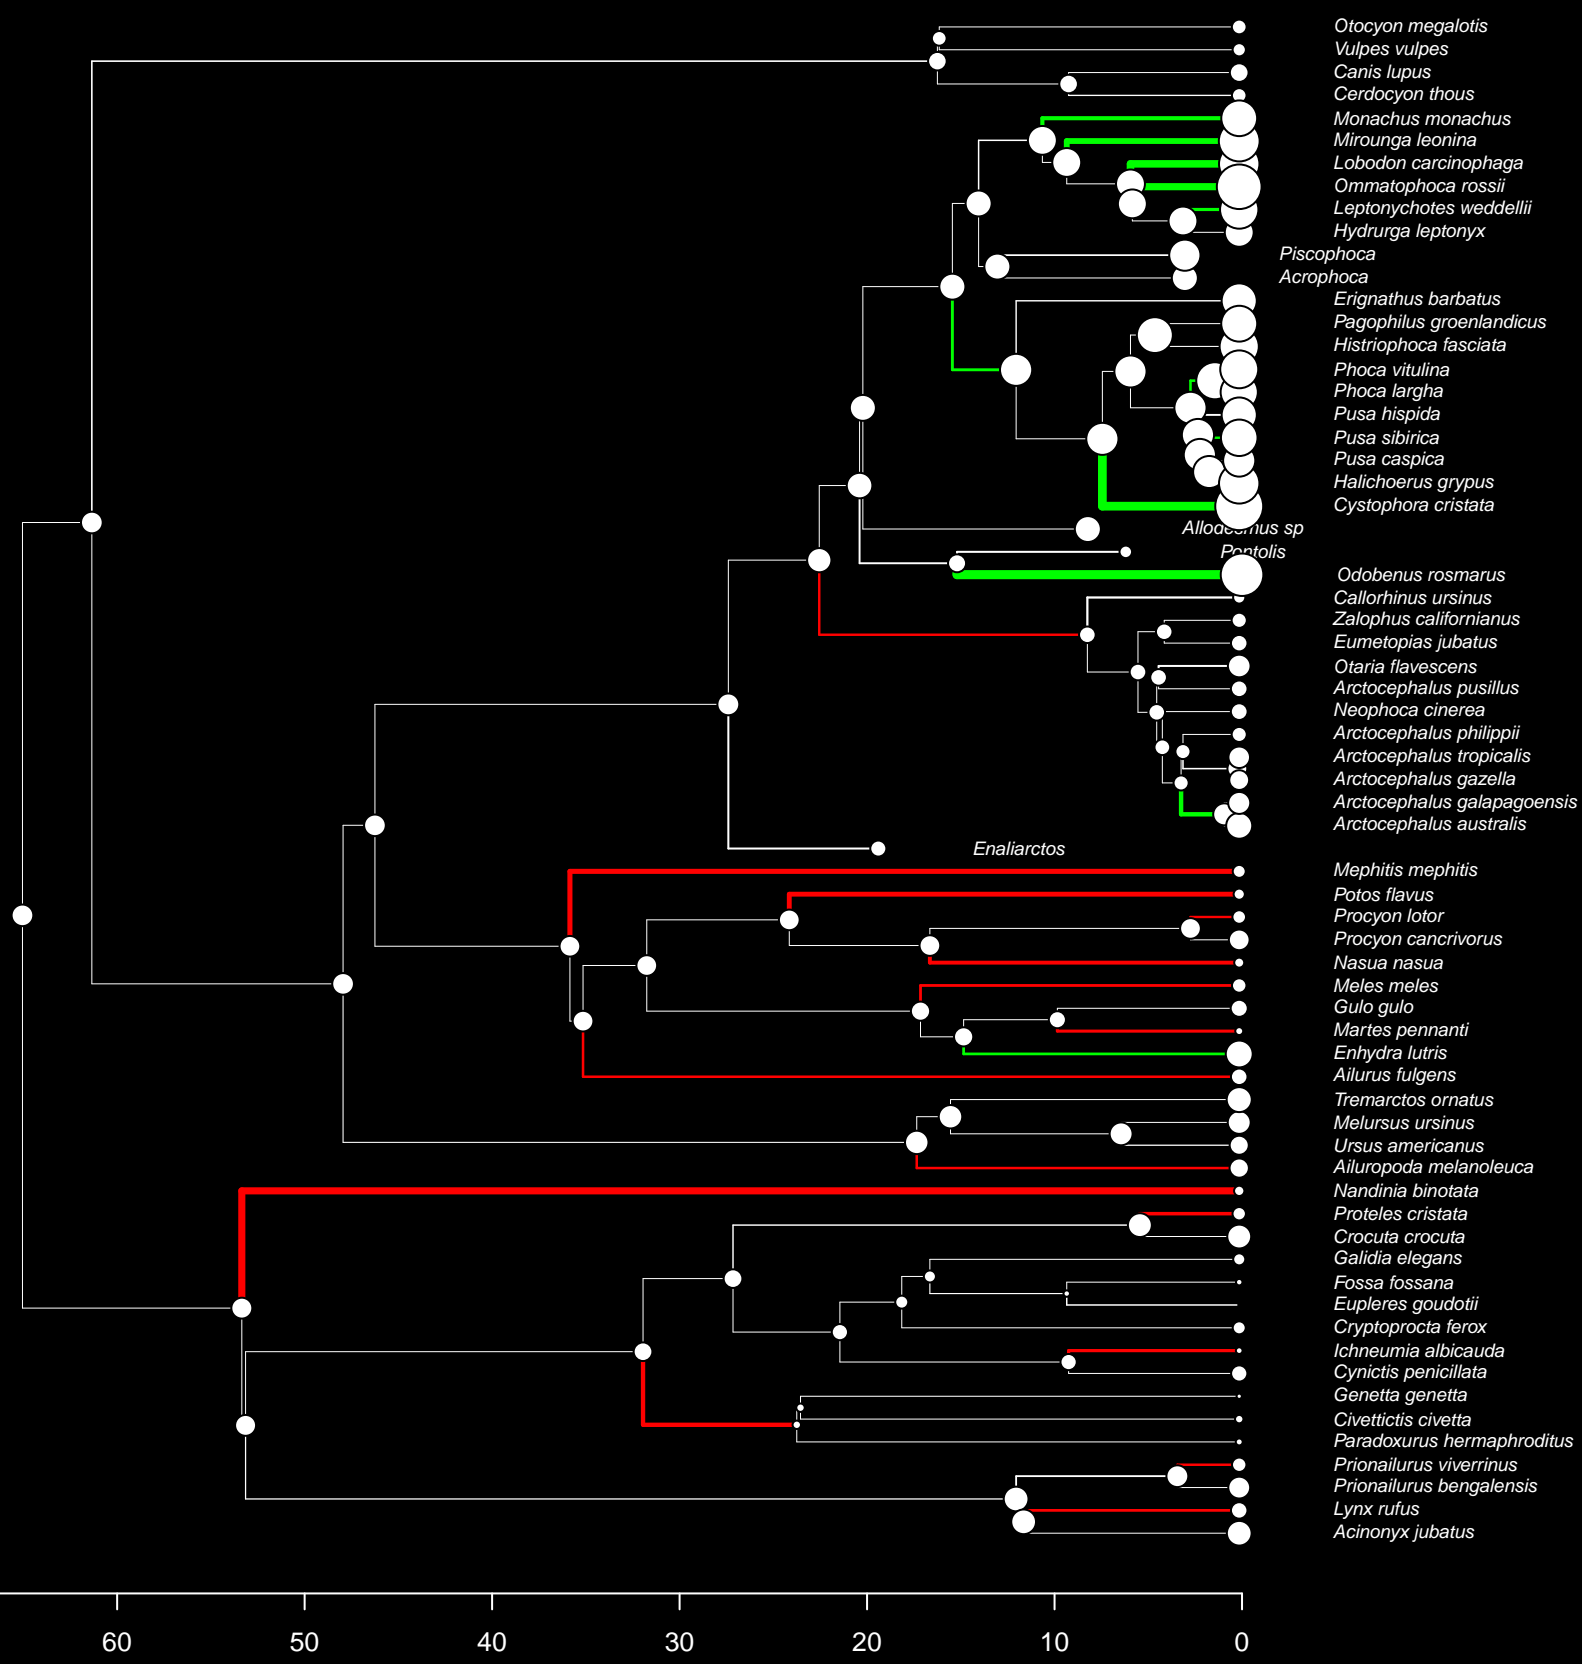

PC2

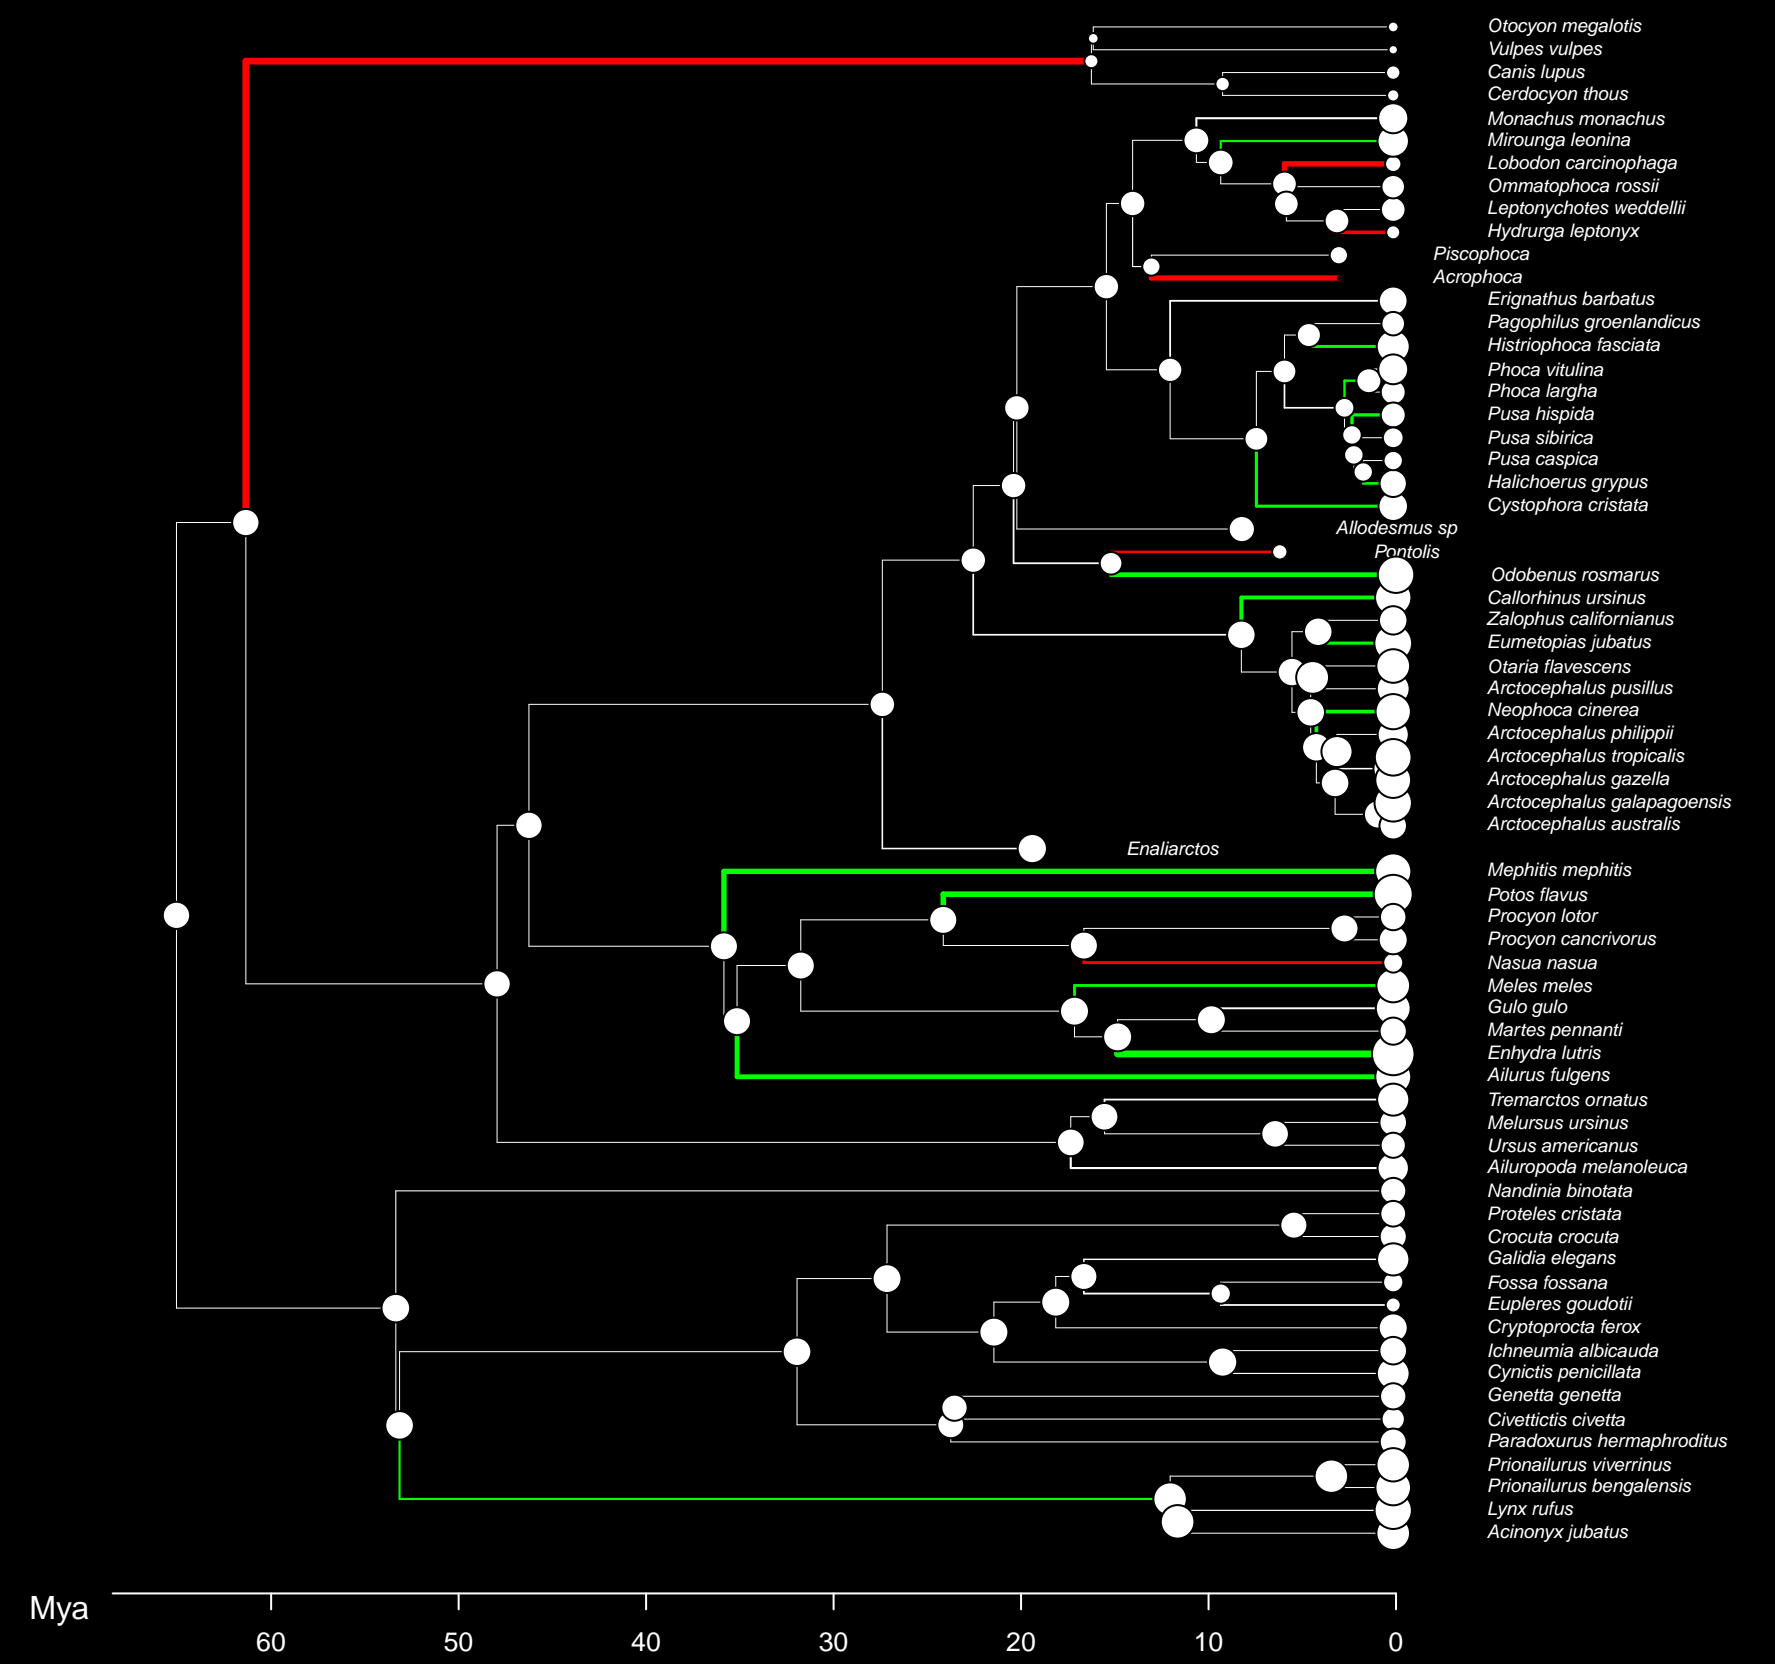

PC3

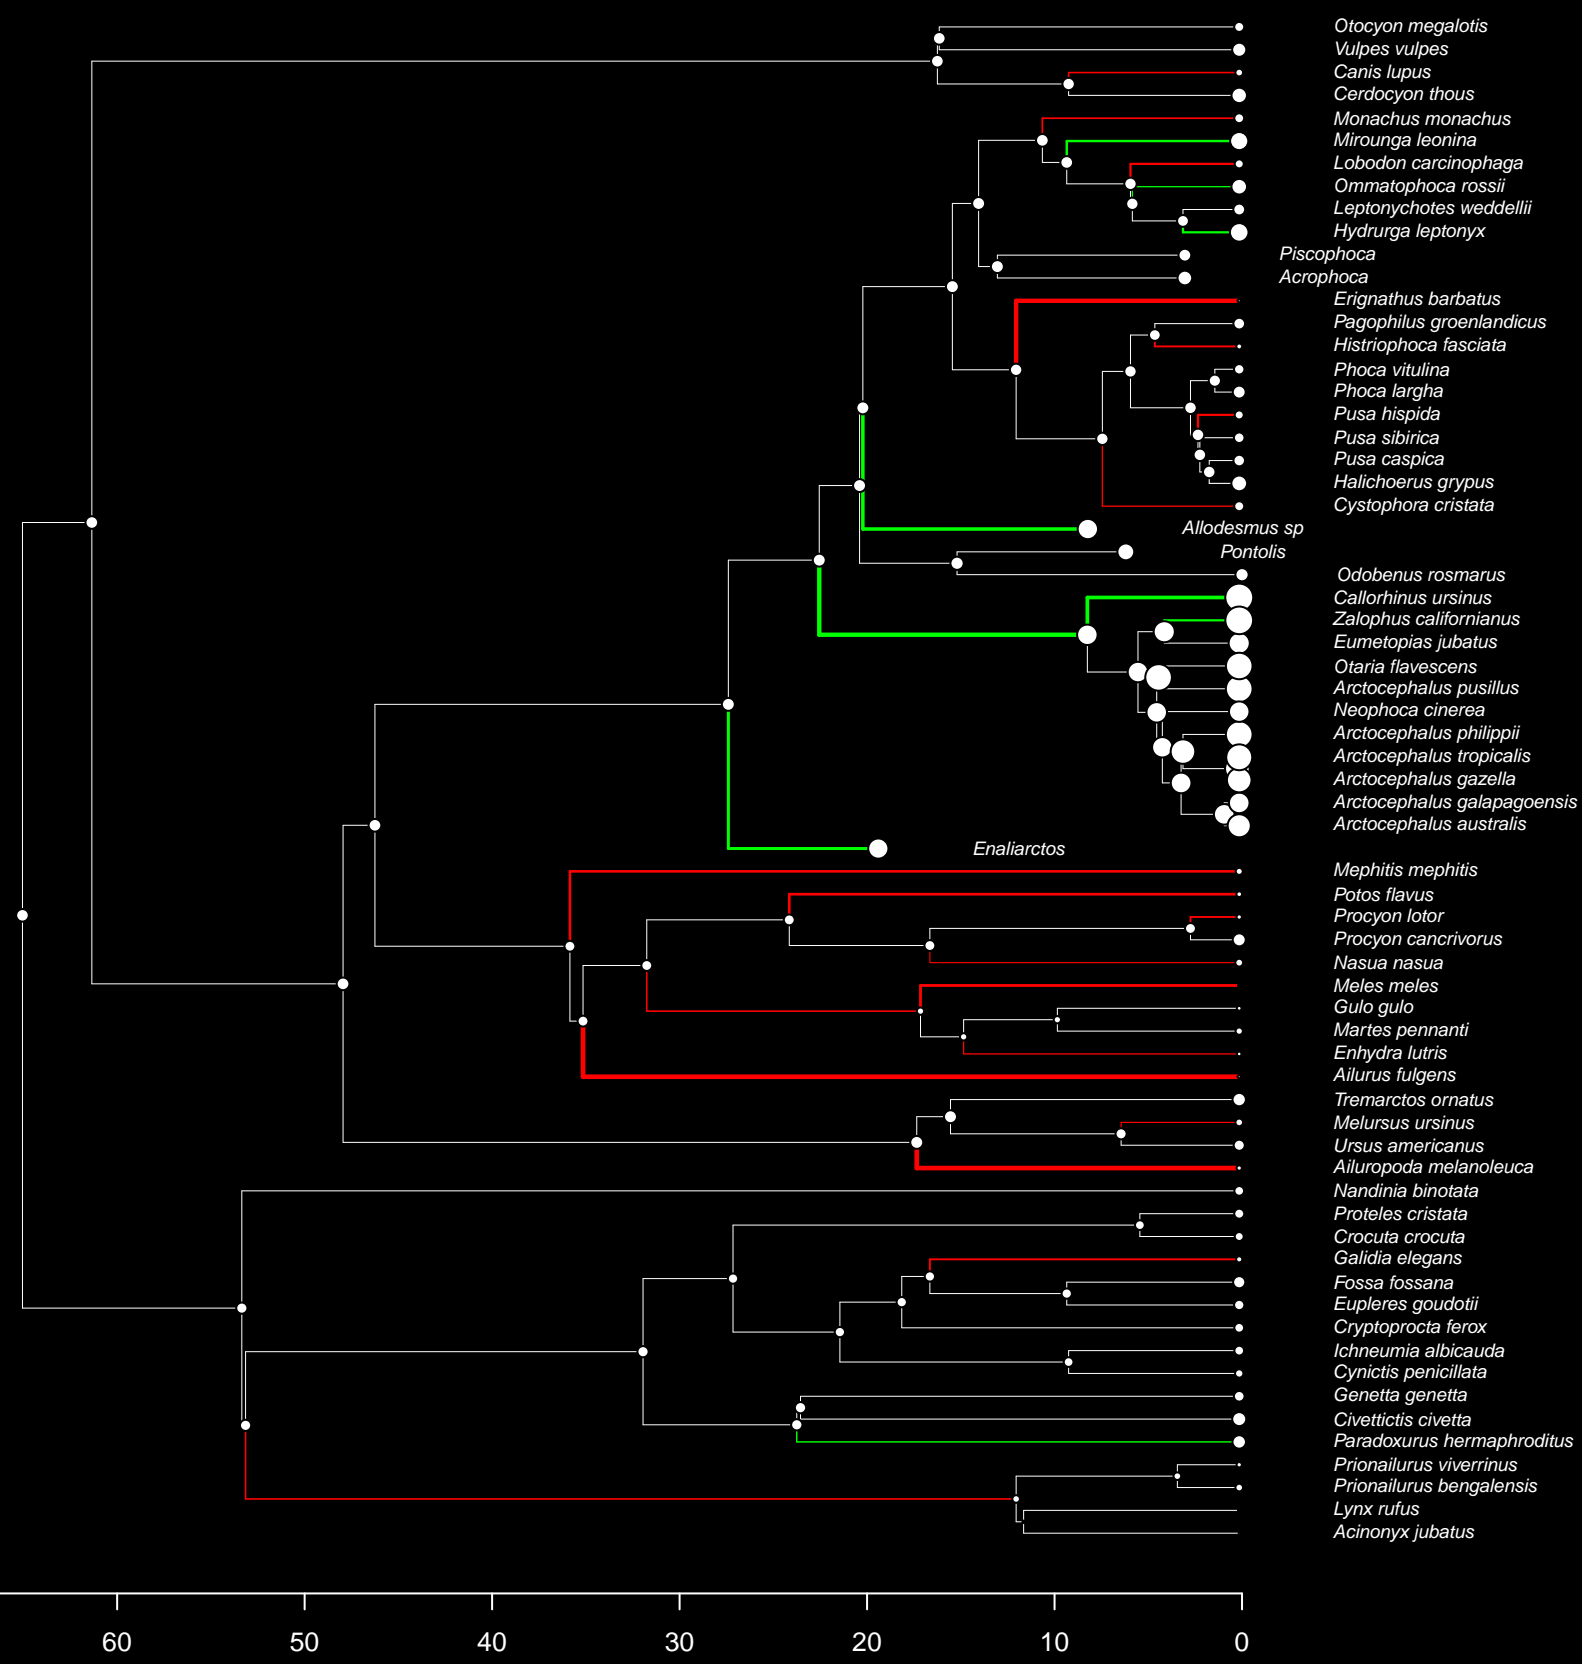

PC4

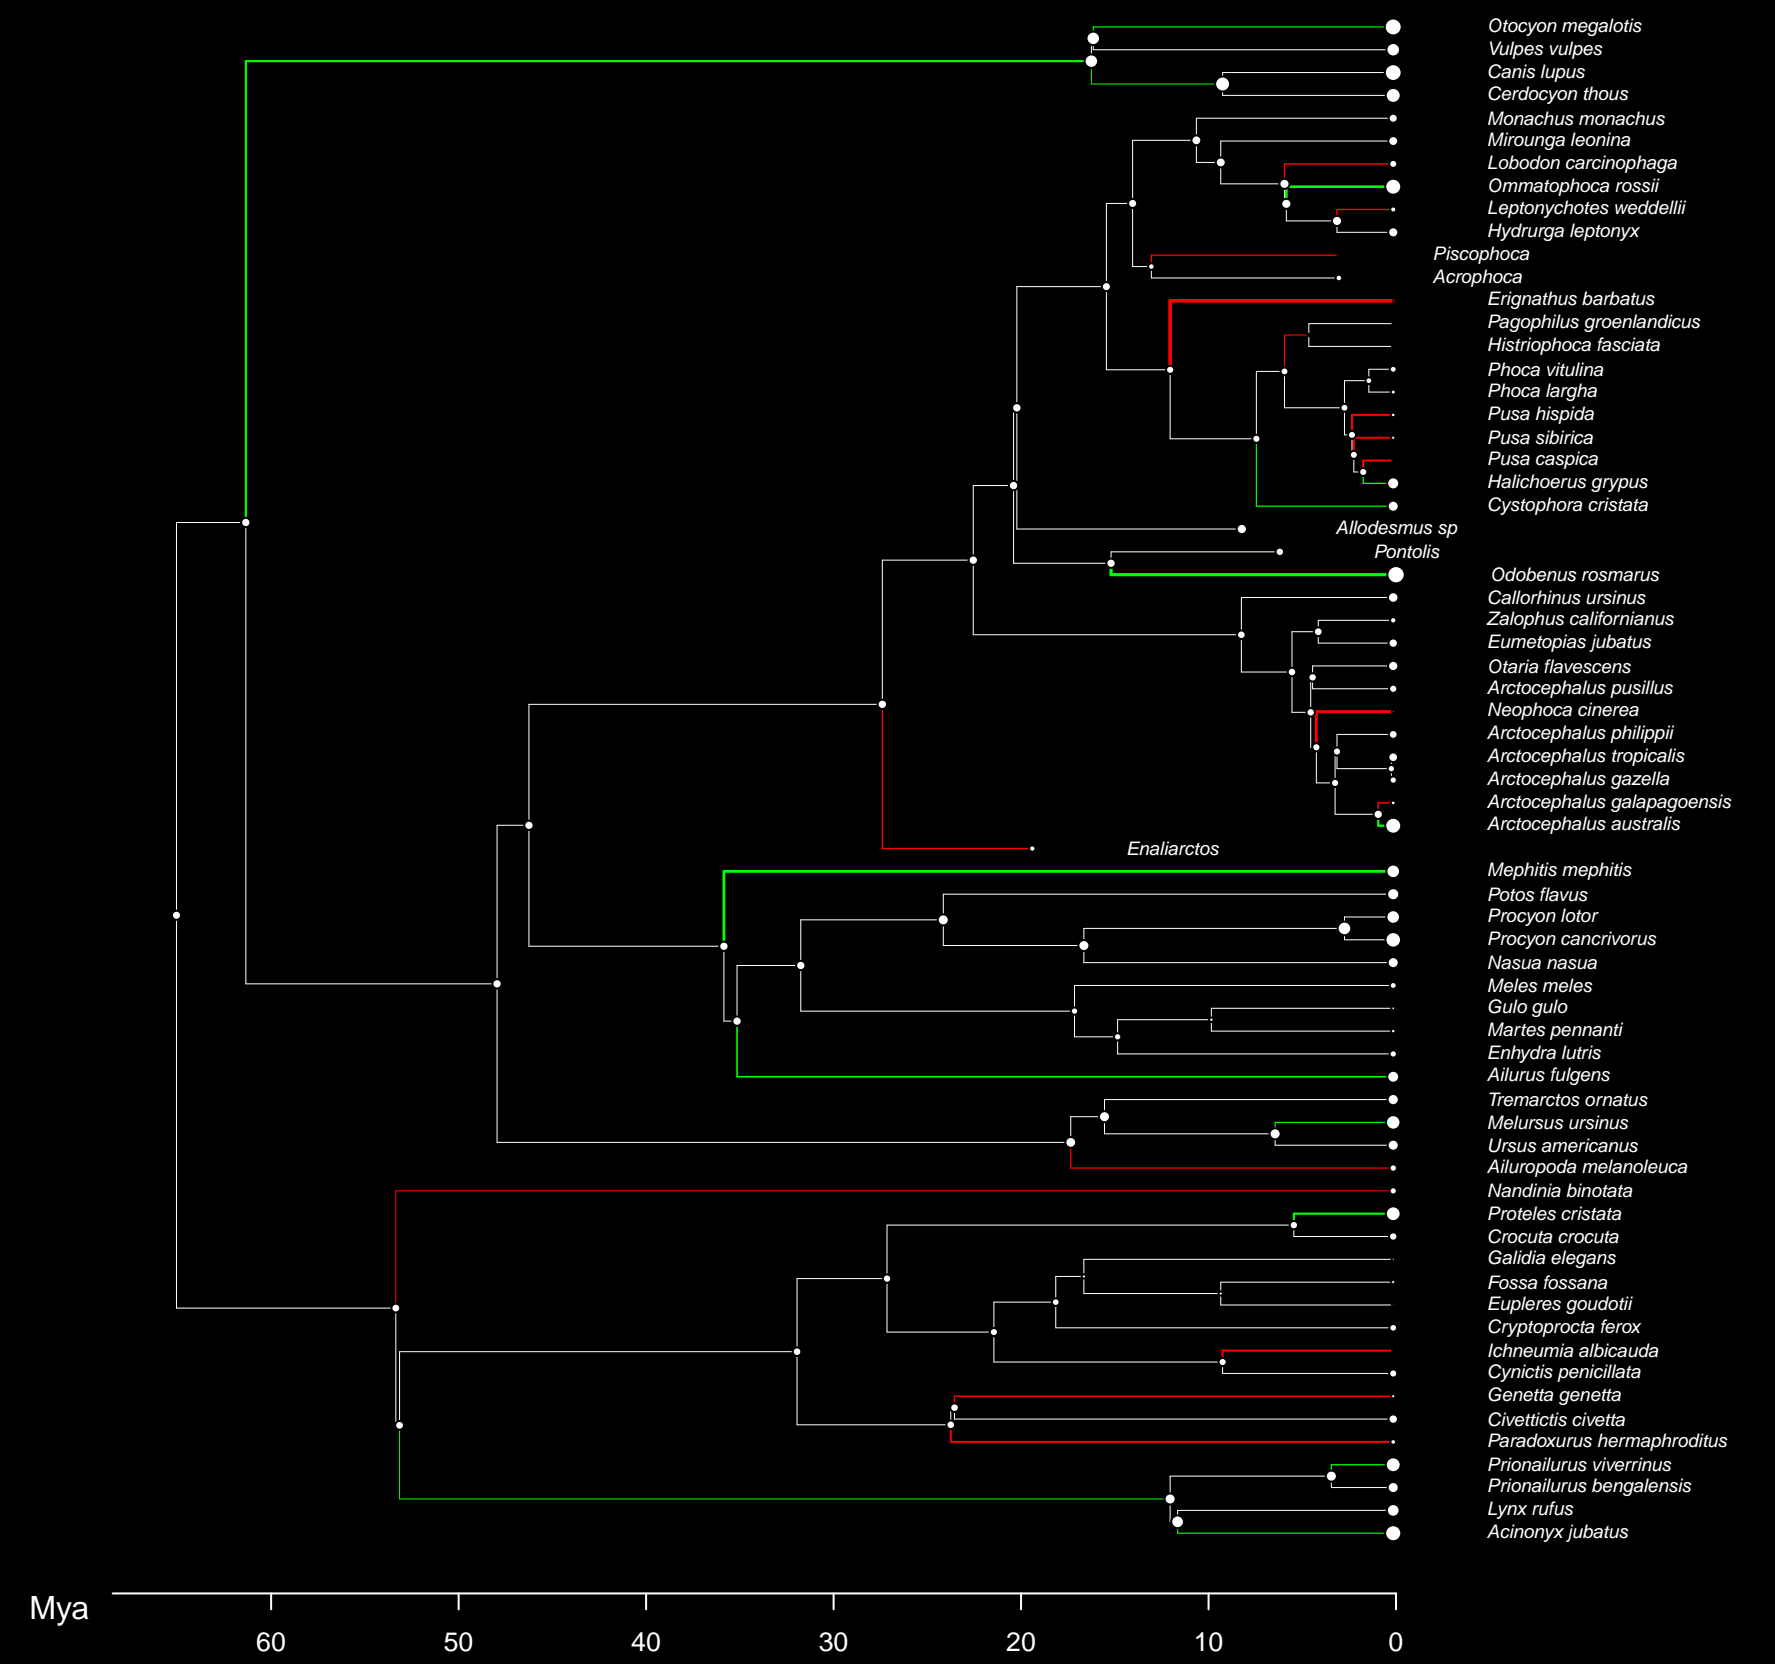

Supplement: 12862_2015_285_MOESM2_ESM.pdf [file 12862_2015_285_MOESM2_ESM.pdf]
