# Supplementary material for: Impact of the terrestrial-aquatic transition on disparity and rates of evolution in the carnivoran skull
Source: PubMed Central journal article supplement (PMC4328284; doi:10.1186/s12862-015-0285-5), 2015-02-04

60Mya

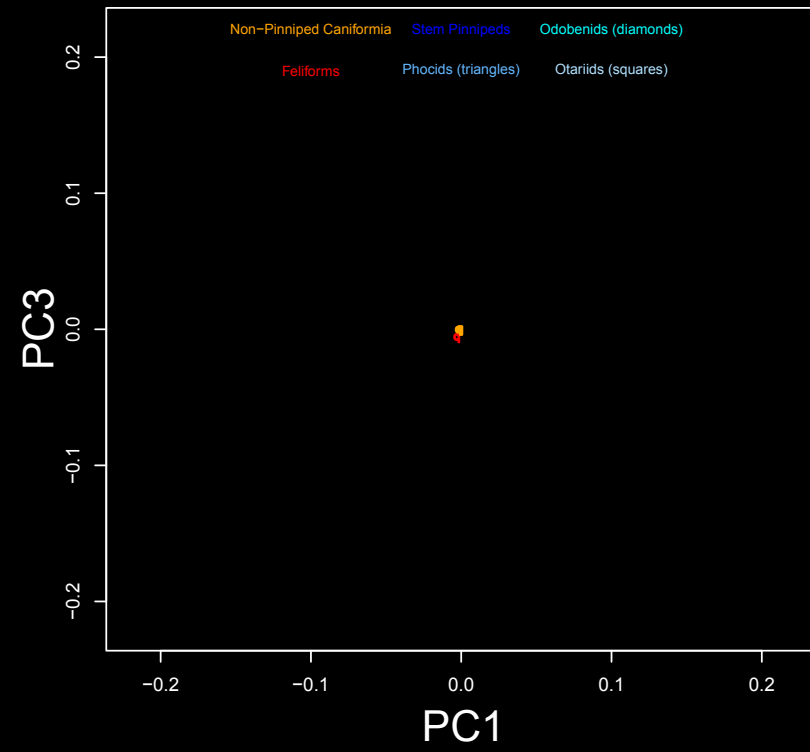

40Mya

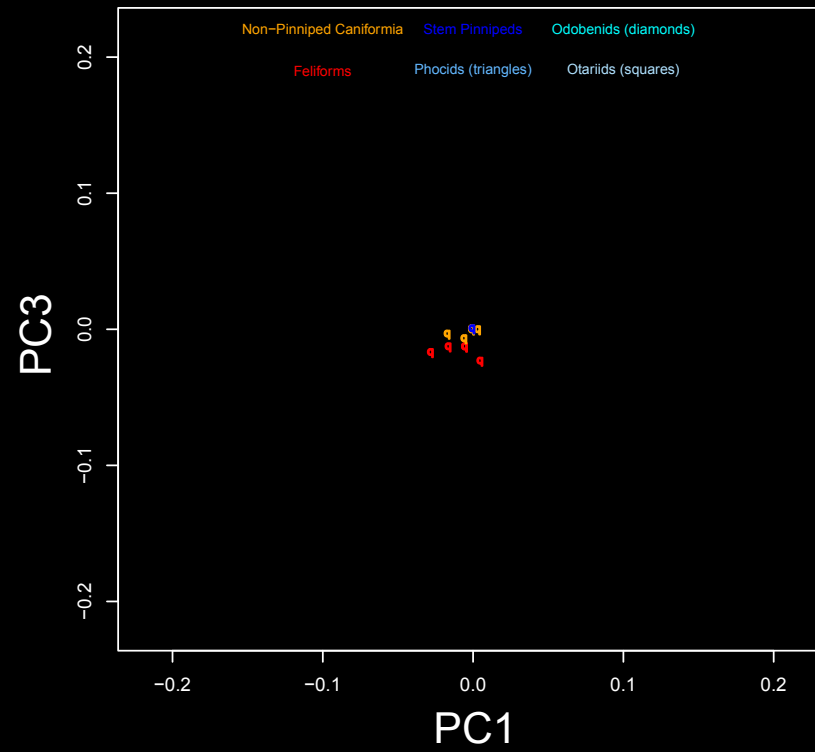

20Mya

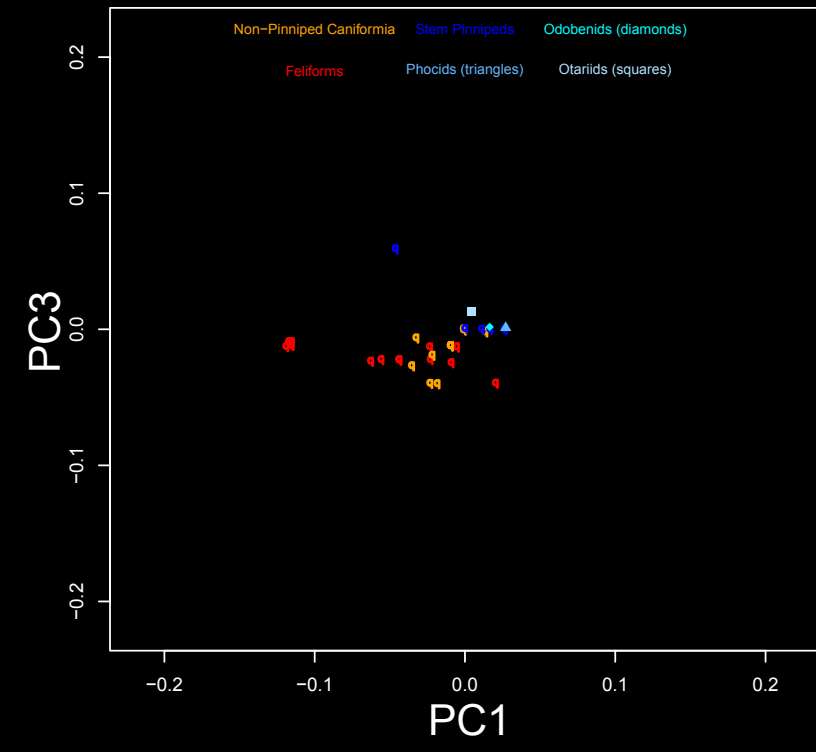

10Mya

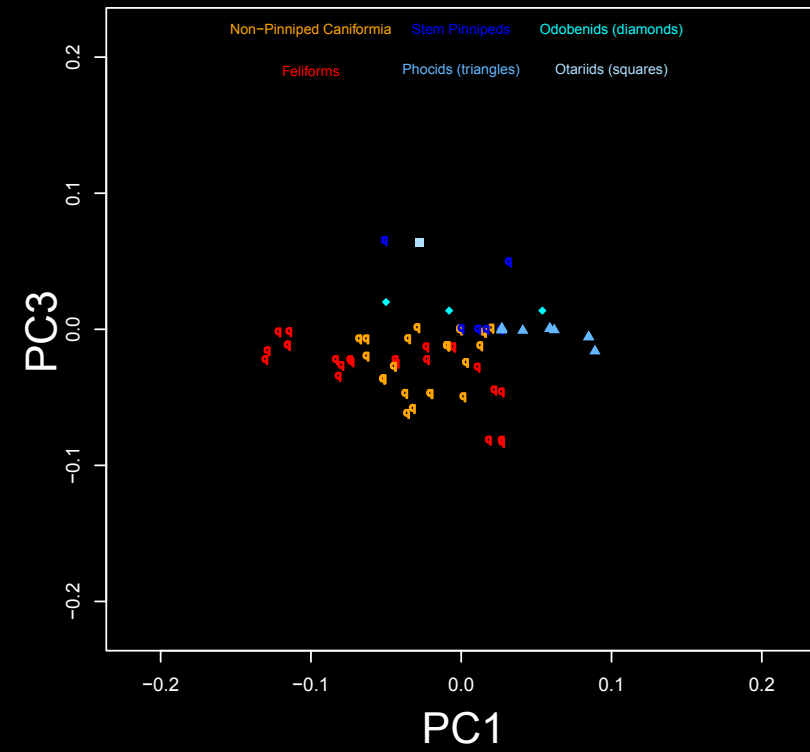

5Mya

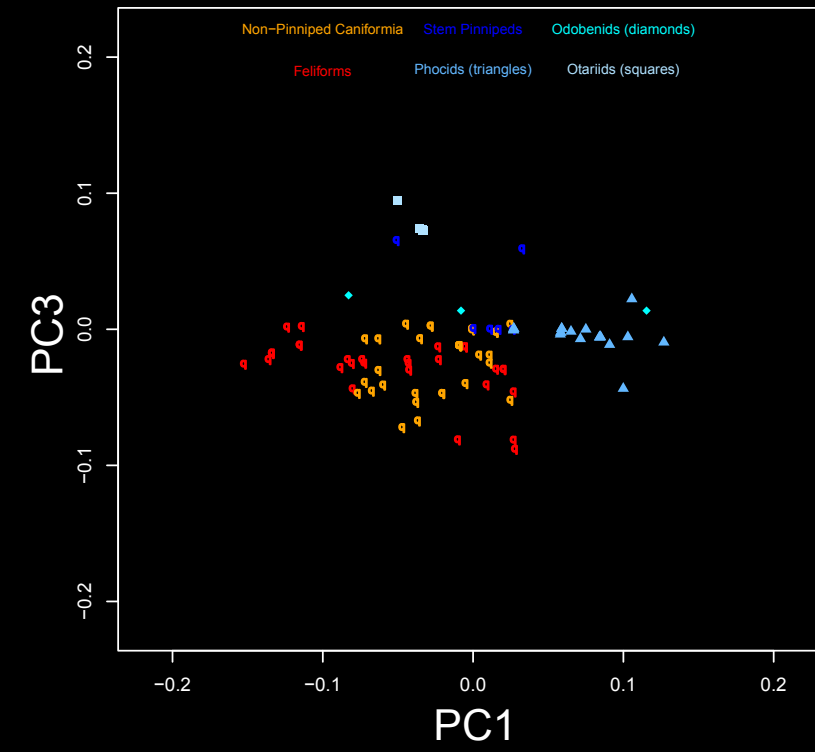

0Mya

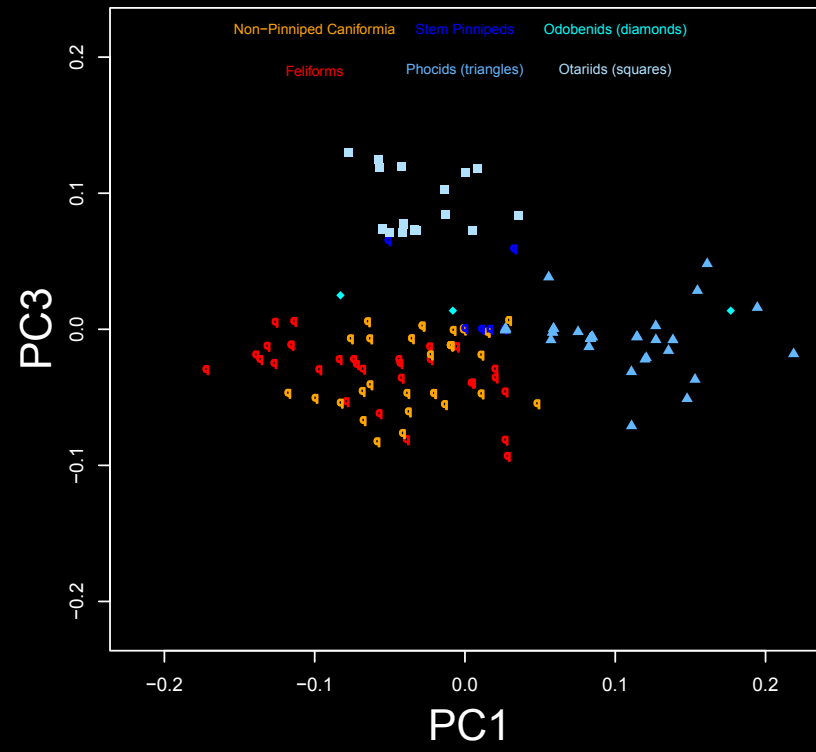

Supplement: 12862_2015_285_MOESM7_ESM.pdf [file 12862_2015_285_MOESM7_ESM.pdf]
